# Supplementary material for: Integrating Diverse Types of Genomic Data to Identify Genes that Underlie Adverse Pregnancy Phenotypes
Source: PLoS One. 2015 Dec 7;10(12):e0144155. doi: 10.1371/journal.pone.0144155 (PMC4671692; doi:10.1371/journal.pone.0144155)
Supplement: S3 Table — (XLSX) [file pone.0144155.s004.xlsx]

## Sheet: Sheet1
S3 Table. Panther categorization of the placental enriched genes from the Protein Atlas Database and their overlap with fast evolving genes.
	PANTHER Annotations - all placental enriched			Overrepresentation analysis - placental enriched (test) to human genome (reference)								PANTHER Annotations - All fast evolving placental enriched genes			Overrepresentation analysis - All fast evolving placental enriched (test) to placental enriched (reference)								PANTHER Annotations - CAC, placental enriched genes			Overrepresentation analysis - CAC, placental enriched (test) to placental enriched (reference)								PANTHER Annotations - HARs placental enriched genes			Overrepresentation analysis - HARS, placental enriched (test) to placental enriched (reference)								PANTHER Annotations - EPS, placental enriched genes			Overrepresentation analysis - EPS, placental enriched (test) to placental enriched (reference)
	Biological Process	Percent of gene hit against total # genes/100	Genes	Biological Process - Overrepresentation								Biological Process	Percent of gene hit against total # genes/100	Genes	Biological Process - Overrepresentation								Biological Process	Percent of gene hit against total # genes/100	Genes	Biological Process - Overrepresentation								Biological Process	Percent of gene hit against total # genes/100	Genes	Biological Process - Overrepresentation								Biological Process	Percent of gene hit against total # genes/100	Genes	Biological Process - Overrepresentation
	apoptotic process (GO:0006915)	0.051	4		Homo sapiens (REF)	Genes in the category	Expected	Fold Enrichment	+/-	P value		apoptotic process (GO:0006915)	0.074	2		Placental enriched (REF)	Genes in the category	Expected	Fold Enrichment	+/-	P value		biological adhesion (GO:0022610)	0.143	1		Placental enriched (REF)	Genes in the category	Expected	Fold Enrichment	+/-	P value		apoptotic process (GO:0006915)	0.2	2		Placental enriched (REF)	Genes in the category	Expected	Fold Enrichment	+/-	P value		apoptotic process (GO:0006915)	0.071	1		Placental enriched (REF)
	biological adhesion (GO:0022610)	0.051	4	Unclassified	8629	29	31.09	0.93	-	0		biological adhesion (GO:0022610)	0.148	4	Unclassified	29	10	10.44	0.96	-	0		cellular process (GO:0009987)	0.571	4	Unclassified	29	2	2.71	0.74	-	0		biological adhesion (GO:0022610)	0.4	4	cell adhesion	4	4	0.53	> 5	+	0.038		biological adhesion (GO:0022610)	0.071	1	Unclassified	29
	biological regulation (GO:0065007)	0.127	10									biological regulation (GO:0065007)	0.185	5									developmental process (GO:0032502)	0.143	1									biological regulation (GO:0065007)	0.4	4	biological adhesion	4	4	0.53	> 5	+	0.038		biological regulation (GO:0065007)	0.286	4
	cellular process (GO:0009987)	0.342	27									cellular process (GO:0009987)	0.407	11									immune system process (GO:0002376)	0.429	3									cellular process (GO:0009987)	0.5	5	cell-cell adhesion	4	4	0.53	> 5	+	0.038		cellular process (GO:0009987)	0.286	4
	developmental process (GO:0032502)	0.165	13									developmental process (GO:0032502)	0.222	6									localization (GO:0051179)	0.143	1									developmental process (GO:0032502)	0.3	3	Unclassified	29	2	3.87	0.52	-	0		developmental process (GO:0032502)	0.286	4
	immune system process (GO:0002376)	0.139	11									immune system process (GO:0002376)	0.259	7									metabolic process (GO:0008152)	0.429	3									immune system process (GO:0002376)	0.5	5									immune system process (GO:0002376)	0.214	3
	localization (GO:0051179)	0.101	8									localization (GO:0051179)	0.111	3									response to stimulus (GO:0050896)	0.429	3									localization (GO:0051179)	0.3	3									localization (GO:0051179)	0.071	1
	metabolic process (GO:0008152)	0.241	19									metabolic process (GO:0008152)	0.333	9									Total	2.287										metabolic process (GO:0008152)	0.6	6									metabolic process (GO:0008152)	0.214	3
	multicellular organismal process (GO:0032501)	0.101	8									multicellular organismal process (GO:0032501)	0.148	4																				multicellular organismal process (GO:0032501)	0.2	2									multicellular organismal process (GO:0032501)	0.286	4
	reproduction (GO:0000003)	0.038	3									reproduction (GO:0000003)	0.074	2									Molecular Function	Percent of gene hit against total # genes/100	Genes	Molecular Function - Overrepresentation								reproduction (GO:0000003)	0.2	2									reproduction (GO:0000003)	0.071	1
	response to stimulus (GO:0050896)	0.139	11									response to stimulus (GO:0050896)	0.259	7									binding (GO:0005488)	0.286	2		Placental enriched (REF)	Genes in the category	Expected	Fold Enrichment	+/-	P value		response to stimulus (GO:0050896)	0.4	4									response to stimulus (GO:0050896)	0.214	3
	Total	1.495										Total	2.22										catalytic activity (GO:0003824)	0.286	2	Unclassified	35	1	3.27	0.31	-	0		Total	4										Total	2.07
																							receptor activity (GO:0004872)	0.286	2
	Molecular Function	Percent of gene hit against total # genes/100	Genes	Molecular Function - Overrepresentation								Molecular Function	Percent of gene hit against total # genes/100	Genes	Molecular Function - Overrepresentation								structural molecule activity (GO:0005198)	0.429	3									Molecular Function	Percent of gene hit against total # genes/100	Genes	Molecular Function - Overrepresentation
	binding (GO:0005488)	0.291	23		Homo sapiens (REF)	Genes in the category	Expected	Fold Enrichment	+/-	P value		binding (GO:0005488)	0.259	7		Placental enriched (REF)	Genes in the category	Expected	Fold Enrichment	+/-	P value		transporter activity (GO:0005215)	0.143	1									binding (GO:0005488)	0.3	3		Placental enriched (REF)	Genes in the category	Expected	Fold Enrichment	+/-	P value		Molecular Function	Percent of gene hit against total # genes/100	Genes	Molecular Function - Overrepresentation
	catalytic activity (GO:0003824)	0.165	13	hormone activity	161	11	0.58	> 5	+	3.12e-09		catalytic activity (GO:0003824)	0.259	7	Unclassified	35	11	12.6	0.87	-	0		Total	1.43										catalytic activity (GO:0003824)	0.5	5	Unclassified	35	3	4.67	0.64	-	0		binding (GO:0005488)	0.214	3		Placental enriched (REF)
	enzyme regulator activity (GO:0030234)	0.038	3	growth factor activity	81	5	0.29	> 5	+	0.00208		enzyme regulator activity (GO:0030234)	0.074	2																				enzyme regulator activity (GO:0030234)	0.2	2									catalytic activity (GO:0003824)	0.143	2	Unclassified	35
	nucleic acid binding transcription factor activity (GO:0001071)	0.038	3	receptor binding	980	17	3.53	4.81	+	9.97e-06		receptor activity (GO:0004872)	0.259	7									Protein Class	Percent of gene hit against total # genes/100	Genes	Protein Class - overrepresentation								receptor activity (GO:0004872)	0.4	4									enzyme regulator activity (GO:0030234)	0.071	1
	receptor activity (GO:0004872)	0.127	10	Unclassified	10020	35	36.11	0.97	-	0		structural molecule activity (GO:0005198)	0.148	4									cell adhesion molecule (PC00069)	0.286	2		Placental enriched (REF)	Genes in the category	Expected	Fold Enrichment	+/-	P value		transporter activity (GO:0005215)	0.2	2									receptor activity (GO:0004872)	0.286	4
	structural molecule activity (GO:0005198)	0.063	5									transporter activity (GO:0005215)	0.074	2									chaperone (PC00072)	0.143	1	Unclassified	26	1	2.43	0.41	-	0		Total	1.6										structural molecule activity (GO:0005198)	0.071	1
	transporter activity (GO:0005215)	0.051	4									Total	1.073										defense/immunity protein (PC00090)	0.429	3																				Total	0.785
	Total	0.773																					extracellular matrix protein (PC00102)	0.286	2
												Protein Class	Percent of gene hit against total # genes/100	Genes	Protein Class - Overrepresentation								hydrolase (PC00121)	0.286	2									Protein Class	Percent of gene hit against total # genes/100	Genes	Protein Class - overrepresentation
	Protein Class	Percent of gene hit against total # genes/100	Genes	Protein Class - Overrepresentation								calcium-binding protein (PC00060)	0.111	3		Placental enriched (REF)	Genes in the category	Expected	Fold Enrichment	+/-	P value		protease (PC00190)	0.286	2									calcium-binding protein (PC00060)	0.1	1		Placental enriched (REF)	Genes in the category	Expected	Fold Enrichment	+/-	P value		Protein Class	Percent of gene hit against total # genes/100	Genes	Protein Class - overrepresentation
	calcium-binding protein (PC00060)	0.038	3		Homo sapiens (REF)	Genes in the category	Expected	Fold Enrichment	+/-	P value		cell adhesion molecule (PC00069)	0.185	5	Unclassified	26	9	9.36	0.96	-	0		receptor (PC00197)	0.286	2									cell adhesion molecule (PC00069)	0.3	3	Unclassified	26	2	3.47	0.58	-	0		calcium-binding protein (PC00060)	0.214	3		Placental enriched (REF)
	cell adhesion molecule (PC00069)	0.127	10	viral coat protein	8	4	0.03	> 5	+	5.27e-06		chaperone (PC00072)	0.037	1									signaling molecule (PC00207)	0.286	2									defense/immunity protein (PC00090)	0.2	2									cell adhesion molecule (PC00069)	0.071	1	Unclassified	26
	chaperone (PC00072)	0.013	1	viral protein	13	4	0.05	> 5	+	3.62e-05		defense/immunity protein (PC00090)	0.148	4									structural protein (PC00211)	0.143	1									enzyme modulator (PC00095)	0.2	2									enzyme modulator (PC00095)	0.071	1
	defense/immunity protein (PC00090)	0.076	6	peptide hormone	165	11	0.59	> 5	+	4.85e-09		enzyme modulator (PC00095)	0.074	2									transfer/carrier protein (PC00219)	0.143	1									extracellular matrix protein (PC00102)	0.2	2									extracellular matrix protein (PC00102)	0.143	2
	enzyme modulator (PC00095)	0.038	3	cell adhesion molecule	507	10	1.83	> 5	+	0.00291		extracellular matrix protein (PC00102)	0.185	5									Total	2.574										hydrolase (PC00121)	0.4	4									hydrolase (PC00121)	0.143	2
	extracellular matrix protein (PC00102)	0.063	5	signaling molecule	1083	17	3.9	4.36	+	4.94e-05		hydrolase (PC00121)	0.222	6																				isomerase (PC00135)	0.1	1									nucleic acid binding (PC00171)	0.071	1
	hydrolase (PC00121)	0.114	9	Unclassified	9675	26	34.86	0.75	-	0		isomerase (PC00135)	0.037	1																				lyase (PC00144)	0.1	1									protease (PC00190)	0.143	2
	isomerase (PC00135)	0.013	1									lyase (PC00144)	0.037	1									Pathways	Percent of gene hit against total # genes/100	Genes	Pathways - Overrepresentation								oxidoreductase (PC00176)	0.1	1									receptor (PC00197)	0.286	4
	lyase (PC00144)	0.013	1									nucleic acid binding (PC00171)	0.037	1									Gonadotropin releasing hormone receptor pathway (P06664)	0.143	1		Placental enriched (REF)	Genes in the category	Expected	Fold Enrichment	+/-	P value		protease (PC00190)	0.4	4									signaling molecule (PC00207)	0.143	2
	nucleic acid binding (PC00171)	0.038	3									oxidoreductase (PC00176)	0.037	1									Thyrotropin-releasing hormone receptor signaling pathway (P04394)	0.143	1	Unclassified	64	6	5.97	1	+	0		receptor (PC00197)	0.4	4									Total	1.285
	oxidoreductase (PC00176)	0.038	3									protease (PC00190)	0.222	6									Total	0.286										signaling molecule (PC00207)	0.2	2
	phosphatase (PC00181)	0.025	2									receptor (PC00197)	0.259	7																				transfer/carrier protein (PC00219)	0.2	2
	protease (PC00190)	0.089	7									signaling molecule (PC00207)	0.185	5																				Total	2.9										Pathways	Percent of gene hit against total # genes/100	Genes	Pathways - Overrepresentation
	receptor (PC00197)	0.127	10									structural protein (PC00211)	0.037	1																															Cortocotropin releasing factor receptor signaling pathway (P04380)	0.071	1		Placental enriched (REF)
	signaling molecule (PC00207)	0.215	17									transfer/carrier protein (PC00219)	0.074	2																				Pathways	Percent of gene hit against total # genes/100	Genes	Pathways - Overrepresentation								Huntington disease (P00029)	0.071	1	Unclassified	64
	structural protein (PC00211)	0.025	2									Total	1.887																					Cortocotropin releasing factor receptor signaling pathway (P04380)	0.1	1		Placental enriched (REF)	Genes in the category	Expected	Fold Enrichment	+/-	P value		Total	0.142
	transcription factor (PC00218)	0.038	3																															Gonadotropin releasing hormone receptor pathway (P06664)	0.1	1	Unclassified	64	8	8.53	0.94	-	0
	transfer/carrier protein (PC00219)	0.051	4									Pathways	Percent of gene hit against total # genes/100	Genes	Pathways - Overrepresentation																			Total	0.2
	transferase (PC00220)	0.013	1									Cortocotropin releasing factor receptor signaling pathway (P04380)	0.037	1		Placental enriched (REF)	Genes in the category	Expected	Fold Enrichment	+/-	P value
	transporter (PC00227)	0.013	1									Gonadotropin releasing hormone receptor pathway (P06664)	0.074	2	Unclassified	64	23	23.04	1	-	0
	viral protein (PC00237)	0.051	4									Huntington disease (P00029)	0.037	1
	Total	1.218										Thyrotropin-releasing hormone receptor signaling pathway (P04394)	0.037	1
												Total	0.185
	Pathways	Percent of gene hit against total # genes/100	Genes	Pathways - Overrepresentation
	Androgen/estrogene/progesterone biosynthesis (P02727)	0.025	2		Homo sapiens (REF)	Genes in the category	Expected	Fold Enrichment	+/-	P value
	Cortocotropin releasing factor receptor signaling pathway (P04380)	0.013	1	Unclassified	18255	64	65.78	0.97	-	0
	Gonadotropin releasing hormone receptor pathway (P06664)	0.051	4
	Heterotrimeric G-protein signaling pathway-Gi alpha and Gs alpha mediated pathway (P00026)	0.013	1
	Heterotrimeric G-protein signaling pathway-Gq alpha and Go alpha mediated pathway (P00027)	0.013	1
	Heterotrimeric G-protein signaling pathway-rod outer segment phototransduction (P00028)	0.013	1
	Huntington disease (P00029)	0.013	1
	Insulin/IGF pathway-mitogen activated protein kinase kinase/MAP kinase cascade (P00032)	0.013	1
	Insulin/IGF pathway-protein kinase B signaling cascade (P00033)	0.013	1
	Muscarinic acetylcholine receptor 1 and 3 signaling pathway (P00042)	0.013	1
	Muscarinic acetylcholine receptor 2 and 4 signaling pathway (P00043)	0.013	1
	Nicotinic acetylcholine receptor signaling pathway (P00044)	0.013	1
	PI3 kinase pathway (P00048)	0.025	2
	Thyrotropin-releasing hormone receptor signaling pathway (P04394)	0.013	1
	Total	0.244
[truncated: 5 more columns]
